# Supplementary material for: Synergistic Effect of Iron Doping and Oxide Hybridization Enables Enhanced Low-Temperature NH₃-SCR Performance of Manganese Oxide Catalyst
Source: Research Square preprint supplement (doi:10.21203/rs.3.rs-6504997/v1), 2025-05-05
Supplement: Supplementary file 1 [file d8cb9a451b806d6ae7d69861.docx]

Supplementary Information

**Synergistic Effect of Iron Doping and Oxide Hybridization Enables Enhanced Low-Temperature NH₃-SCR Performance of Manganese Oxide Catalyst**

Xuewen Lia,#, Yaru Lia,#, Menglin Wanga, Can Wangb, Wenxian Jingc, Lisheng Fangc, Yonghua Hud,*, Yundong Liangc, Xianbiao Wanga,*

a Anhui Province International Research Center on Advanced Building Materials, School of Materials Science and Chemical Engineering, Anhui Jianzhu University, Hefei 230601, PR China

b School of Environment and Energy Engineering, Anhui Jianzhu University, Hefei 230601, PR China

c Anhui Shiqing Environmental Protection Technology Co., Ltd, Hefei 231121, PR China

d Center of Technology, China Tobacco Anhui Industrial Co., Ltd, Hefei 230088, PR China

#Xuewen Li and Yaru Li contributed equally to this work.

*Corresponding author.

E-mail address: xbwang@ahjzu.edu.cn (X. Wang); huyh@mail.ustc.edu.cn (Y. Hu)


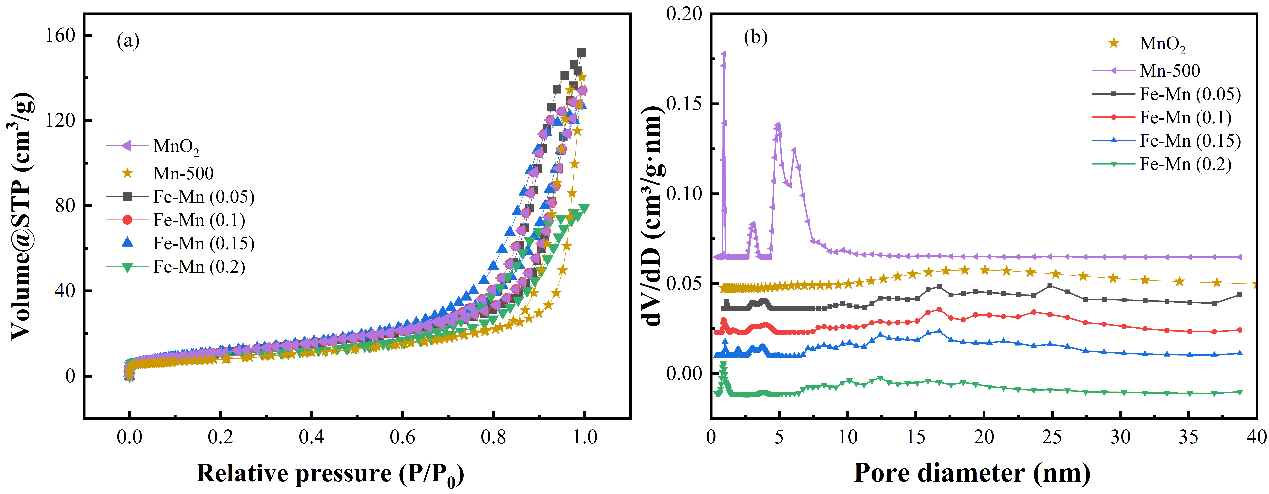


**Fig. S1** (a) N2 adsorption-desorption isotherms and (b) pore size distributions of catalysts.

**Table S1**. Pore texture parameters of catalysts.

| Catalyst | BET (m²·g-1) | Average pore size (nm) | Total pore volume (cm3·g-1) |
| --- | --- | --- | --- |
| MnO2 | 104.0 | 5.61 | 0.24 |
| Mn-500 | 26.2 | 23.31 | 0.22 |
| Fe-Mn (0.05) | 34.6 | 16.41 | 0.25 |
| Fe-Mn (0.1) | 35.4 | 14.71 | 0.22 |
| Fe-Mn (0.15) | 36.5 | 12.94 | 0.21 |
| Fe-Mn (0.2) | 32.5 | 13.04 | 0.13 |

**Table S2**. Surface elemental analysis of Fe-Mn (X).

| Catalyst | Mn4+/(Mn4++Mn3++Mn2+) (%) | Oβ/(Oα +Oβ+ Oγ) (%) | Fe3+/(Fe3++ Fe2+) (%) |
| --- | --- | --- | --- |
| Fe-Mn (0.05) | 22.07 | 21.40 | 36.35 |
| Fe-Mn (0.1) | 24.16 | 23.99 | 48.93 |
| Fe-Mn (0.15) | 30.36 | 27.43 | 51.00 |
| Fe-Mn (0.2) | 27.24 | 23.78 | 62.43 |

**Table** **S3**. Summary of the NH3-TPD adsorption amounts of catalysts.

| Catalyst | aSⅠ | aSⅡ | aSⅢ |
| --- | --- | --- | --- |
| Mn-500 | 241 | 277 | 209 |
| Fe-Mn (0.05) | 257 | 240 | 57 |
| Fe-Mn (0.1) | 290 | 244 | 110 |
| Fe-Mn (0.15) | 382 | 332 | 310 |
| Fe-Mn (0.2) | 288 | 135 | 320 |

aS represents the integrated area.

**Table S4**. Comparison of Fe-Mn (0.6) with reported catalysts for NH3-SCR.

| Catalyst | Reaction condition | NOx conversion  (Temperature) | N2 selectivity | Refs |
| --- | --- | --- | --- | --- |
| Fe–Mn nano-sized catalyst | 0.04%NH3, 0.04%NO,  5vol%O2,  24000 h−1 | >80%  max=95%  (175~240°C) | >70%  max=95% | [S1] |
| Co7Mn3Ox | 0.05%NH3, 0.05%NO,  5vol%O2,  80000h-1 | >80%  max=99%  (175~300°C) | >90%  max=98% | [S2] |
| FeVO4/CeTiOx | 0.03%NH3, 0.03%NO, 16vol%O2,  33600 mL g−1 h−1 | >90%  max=99%  (175~350°C) | >94%  max=98% | [S3] |
| MnCe-5%HPMo | 0.05%NH3, 0.05%NO,  5vol%O2,  200000 ml g−1 h−1 | >15%  max=50%  (175~250°C) | >95%  max=98% | [S4] |
| SmxMn0.3−xTi | 0.06%NH3, 0.06%NO,  5vol%O2,  36000 h−1 | >92%  max=100%  (175~250°C) | >80%  max=98% | [S5] |
| Mn/ZrTiOx | 0.05% NH3, 0.05%NO,  5vol%O2,  50000 h–1 | >82%  max=100%  (175~330°C) | >80%  max=98% | [S6] |
| MnOx@Fe2O3 | 0.05% NH3, 0.05%NO,  5vol%O2,  40000 h–1 | >97%  max=100%  (175~330°C) | >98%  max=100% | [S7] |
| Fe-Mn (0.15) | 0.05% NH3, 0.05%NO,  3vol%O2,  60000 h–1 | >90%  max=96%  (175~300°C) | >99%  max=100% | Our work |

**References**

[S1] Yang Q., Cai Z., Lu Y., Xiong F., Liu J., Sun Y., Xu M., Zhu B. (2024) N2 selectivity of Fe–Mn nano-sized catalysts in selective catalytic reduction of ammonia. J. Energy Inst. 114:101565

[S2] Meng D., Xu Q., Jiao Y., Guo Y., Guo Y., Wang L., Lu G., Zhan W. (2018) Spinel structured CoaMnbOx mixed oxide catalyst for the selective catalytic reduction of NOx with NH3. Appl Catal B: Environ 221:652-663

[S3] Ding L., Gao X., Li Y., Zhao H., Qian L., Long H. (2024) The promotion mechanism of CeTiOx carrier on activity and H2O resistance in a novel FeVO4-based catalyst for NH3-SCR deNOx. Fuel 374:132503

[S4] Dong Y., Ran M., Zhang X., Lin S., Li W., Yang Y., Song H., Wu W., Liu S., Zheng C., Gao X. (2024) Promoting effect of polyoxometallic acid modification on the NH3-SCR performance of Mn-based catalysts. J. Environ. Chem. Eng 12:112823

[S5] Zhang S., Zhang B., Wu B., Liu B., Zhang S. (2023) Effect of samarium on the N2 selectivity of SmxMn0.3−xTi catalysts during selective catalytic reduction of NOx with NH3. Int J Min Met Mater 30:642-652

[S6] Che Y., Liu X., Shen Z., Zhang K., Hu X., Chen A., Zhang D. (2023) Improved N2 selectivity of MnOx catalysts for NOx reduction by engineering bridged Mn3+ sites. Langmuir 39:7434-7443

[S7] Li Y., Hou Y., Zhang Y., Yang Y., Huang Z. (2022) Confinement of MnOx@Fe2O3 core-shell catalyst with titania nanotubes: enhanced N2 selectivity and SO2 tolerance in NH3- SCR process. J. Colloid Interface Sci. 608:2224-2234
